# Supplementary material for: Unidirectional Electric Field Enables Reversible Ferroelectric Domain Engineering
Source: Research Square preprint supplement (doi:10.21203/rs.3.rs-5661145/v1), 2025-04-28
Supplement: Supplementary file 2 [file 233b72a0eb0bd2fbfd9e8cef.docx]

Extended Data Figures For

**Unidirectional Electric Field Enables Reversible Ferroelectric Domain Engineering**

Xingan Jiang1, Muzhi Li2, Yuanyuan Cui3, Xiao Wu4, Zunyi Deng3, Xiangping Zhang3,5, Jianming Deng6, Xiaolei Wang7, Dongdong Zhang1, Xiangdong Yang1, Zhuoyin Peng2, Zhao Liang1,†, Xueyun Wang3,† and Weiyou Yang1,†

*1Institute of Micro/Nano Materials and Devices, Ningbo University of Technology, Ningbo City, 315211, P. R. China*

*2School of Energy and Power Engineering, Changsha University of Science & Technology, Changsha, 410014, P. R. China.*

*3School of Aerospace Engineering, Beijing Institute of Technology, Beijing, 100081, P. R. China.*

*4College of Materials Science and Engineering, Fuzhou University, Fuzhou 350108, P. R. China.*

*5Department of Materials Science and Engineering, Southern University of Science and Technology, Shenzhen, Guangdong, 518055, P. R. China.*

*6Guangdong Provincial Key Laboratory of Electronic Functional Materials and Devices, Huizhou University, Huizhou, Guangdong, 516001, P. R. China.*

*7School of Physics and Optoelectronic Engineering, Beijing University of Technology, Beijing 100124, P. R. China.*

†Corresponding Authors Emails: walleliang@hnu.edu.cn; xueyun@bit.edu.cn; weiyouyang@tsinghua.org.cn


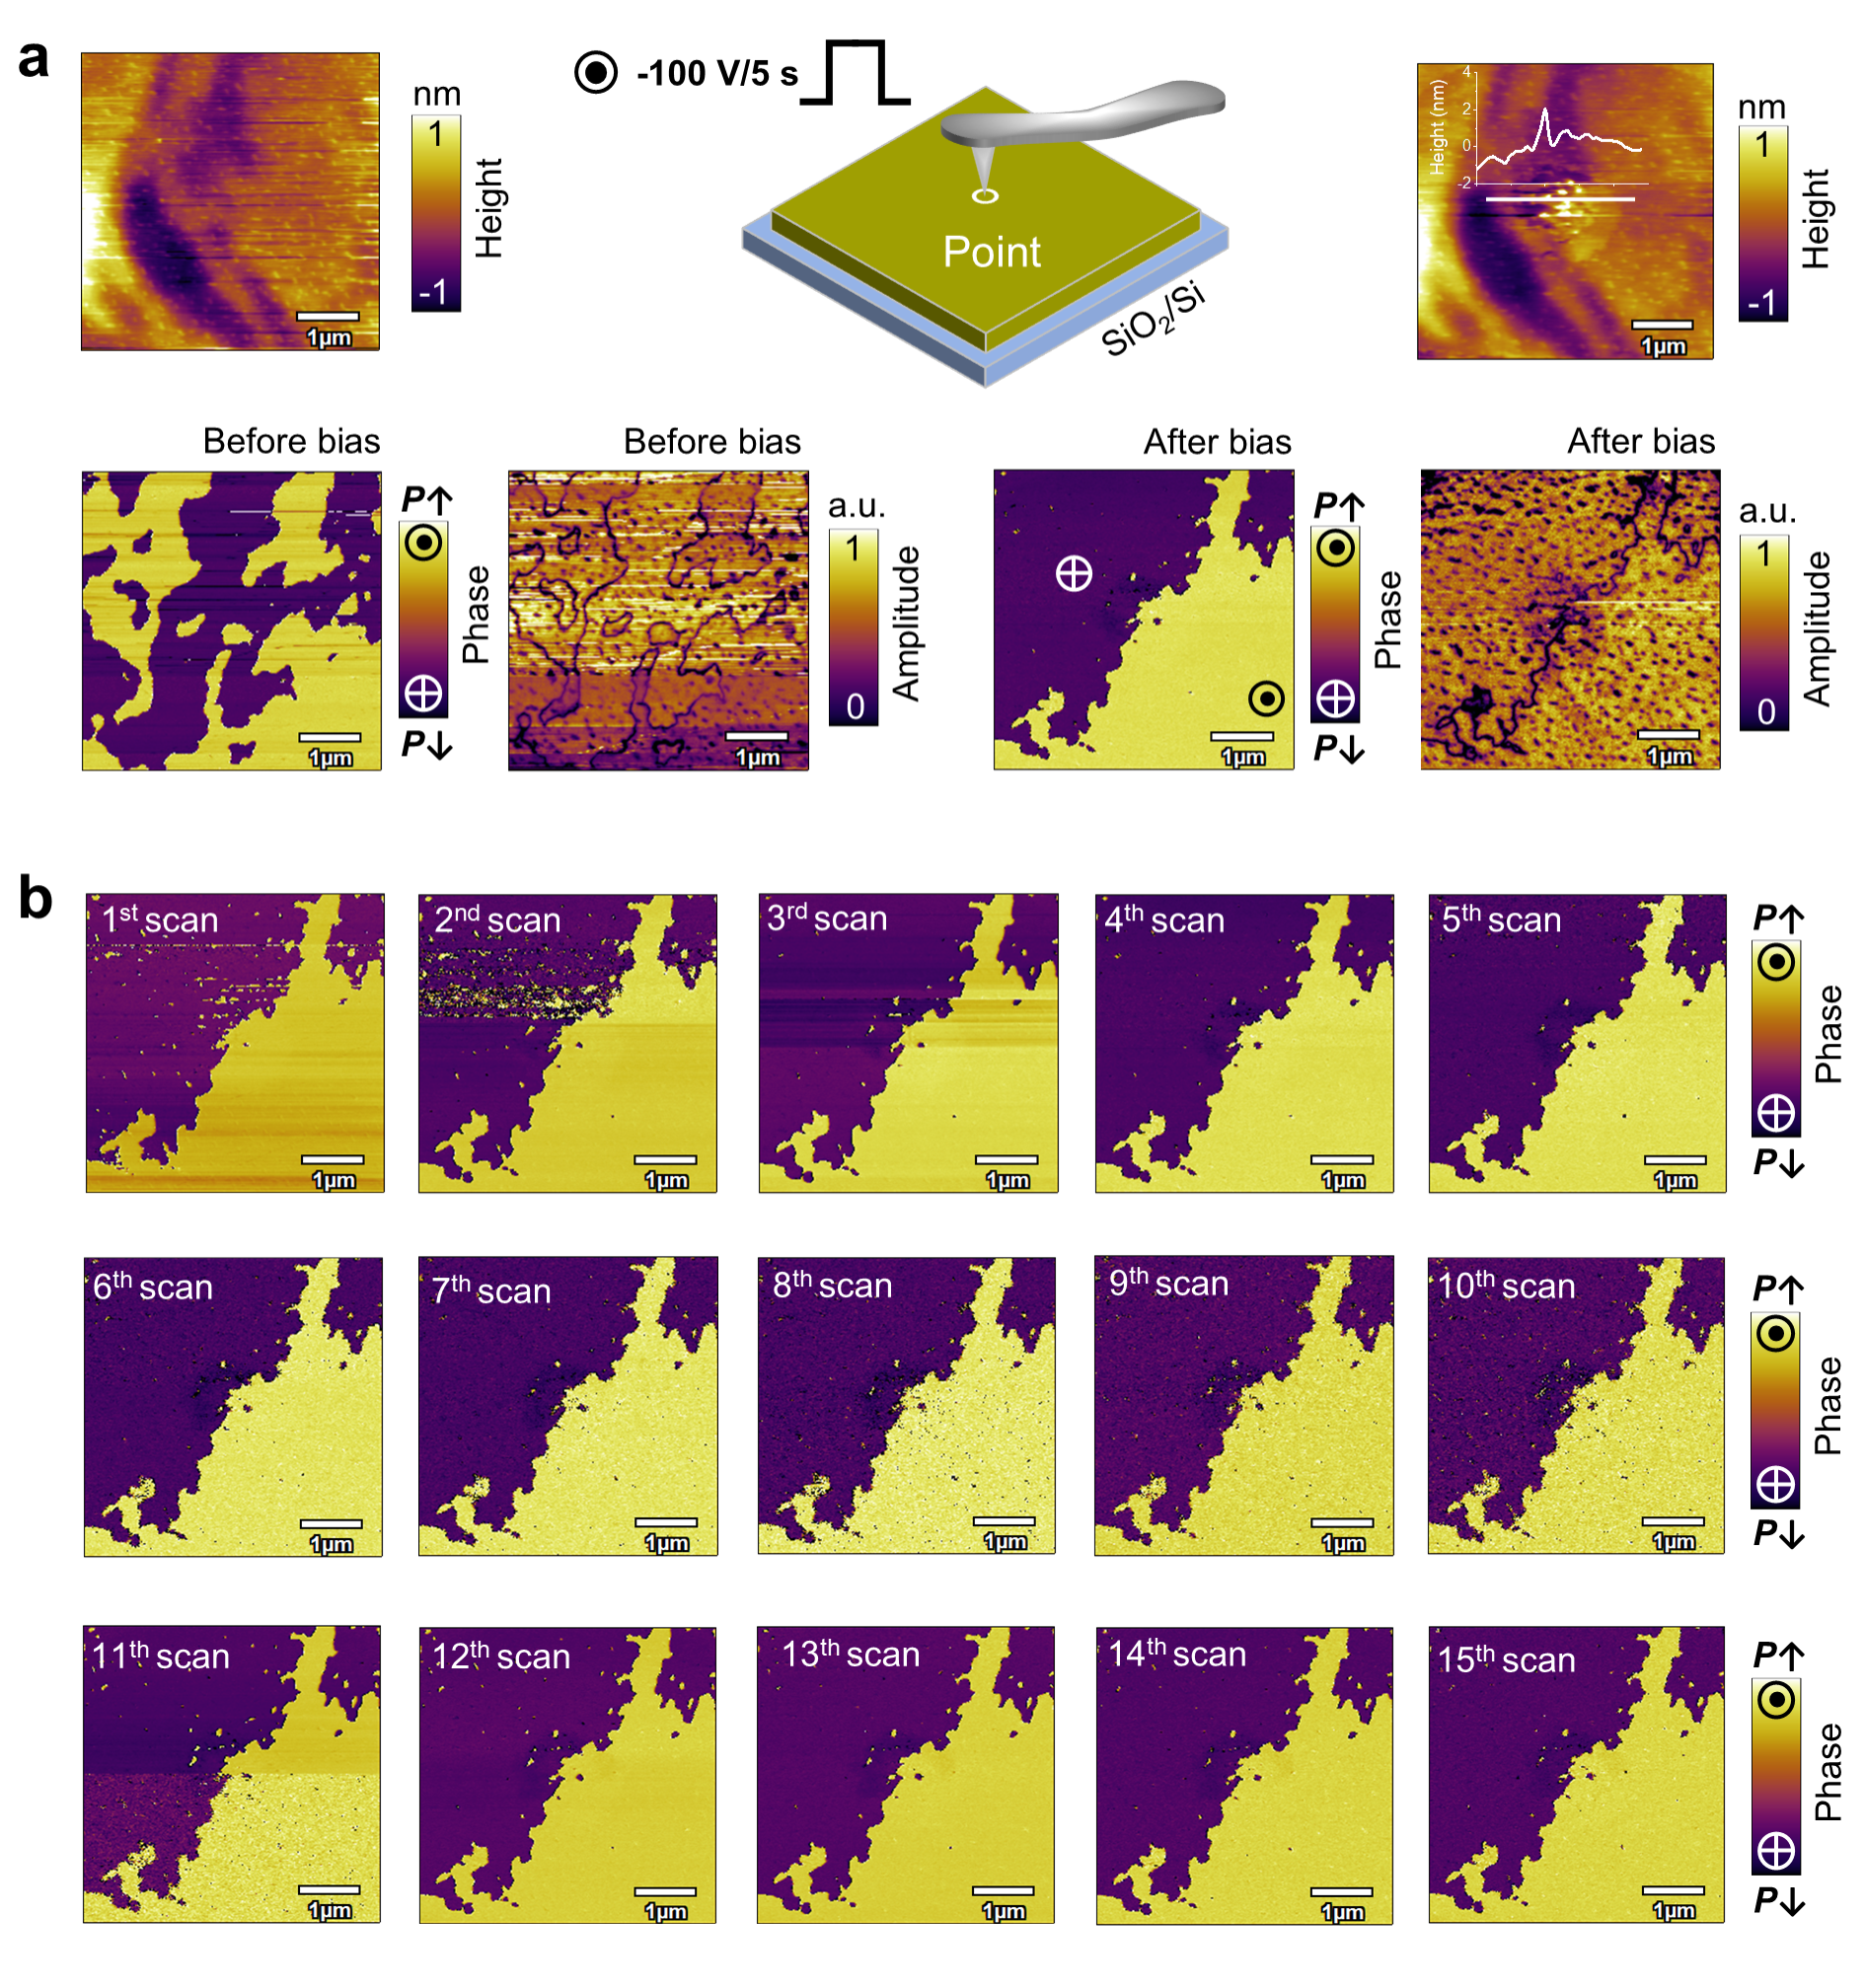


**Extended Data Fig.** **1 | Stability of the switched ferroelectric domains** **after the bias withdrawal.** **a** The surface topography and ferroelectric domain changes before and after applying bias (-100 V, 5 s). The bias is applied at a central point location while maintaining an open circuit. **b** The stability of the switched domains monitored by ultrafast scan imaging.Bias (-100 V, 5 s) is applied through a conductive tip, then immediately removed, followed by continuously scanning quickly (~26 s per image) to monitor the domains.


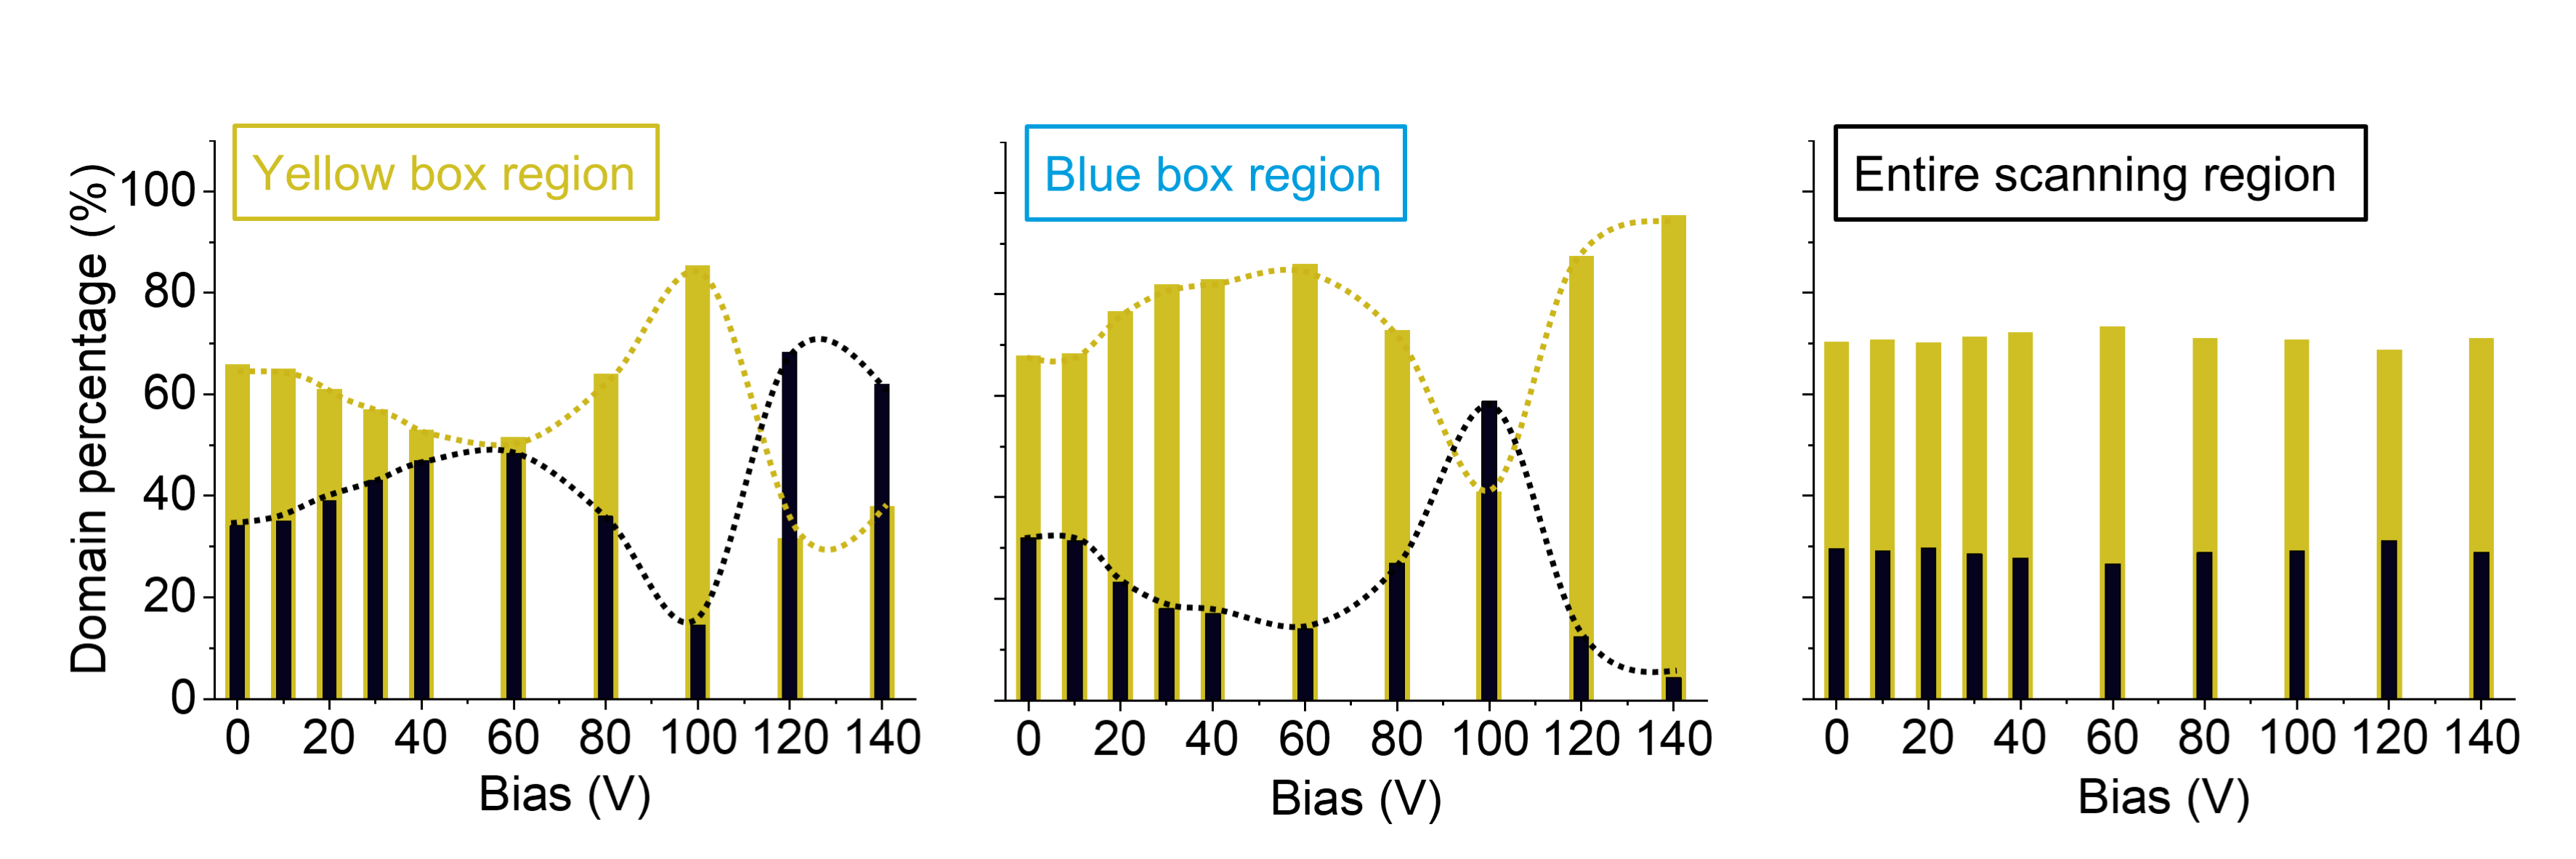


**Extended Data Fig. 2 | The domain percentages after applying unidirectional electric fields with progressively increased magnitude.** The domain percentages of purple-black domains (***P↓***) and yellow domains (***P↑***) are extracted in the yellow, blue box regions, as well as the entire scanning area in Fig. 3c under different bias magnitude.


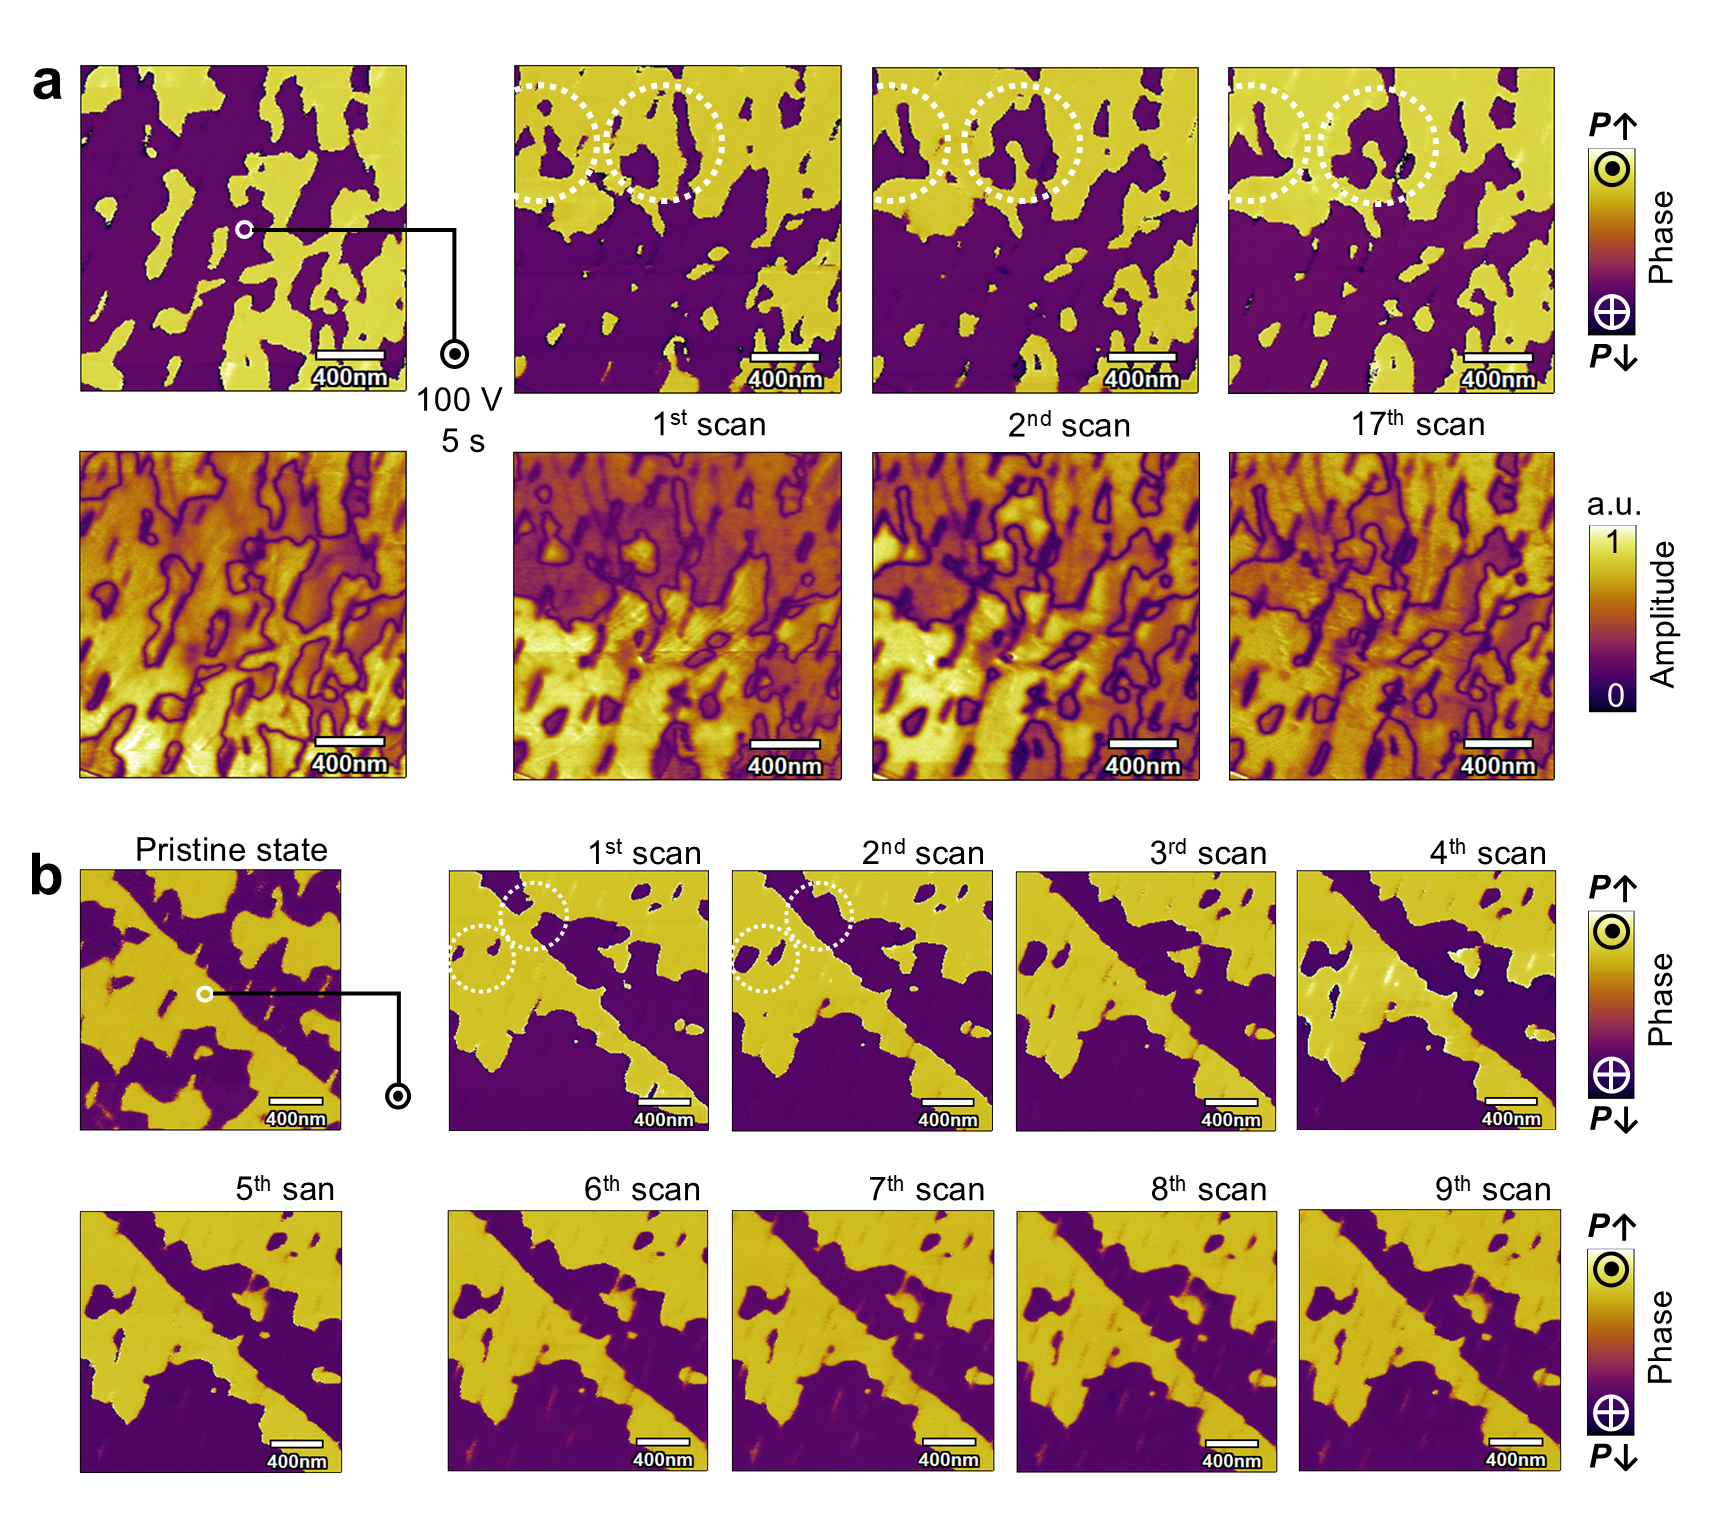


**Extended Data Fig. 3 | Relaxation behaviors of electrically switched ferroelectric domains after the electric field withdrawal.** **a** Bias (-100 V, 5 s) is applied at the central point location, then immediately removed, followed by continuously scanning quickly (~26 s per image for panel **a**) and (~52 s per image for panel **b**) to monitor their relaxation of switched domains. A small portion of switched domains are rapidly relaxed to their original shape in a minute after the electric field withdrawal. However, the majority of switched ferroelectric domains are stabilized.


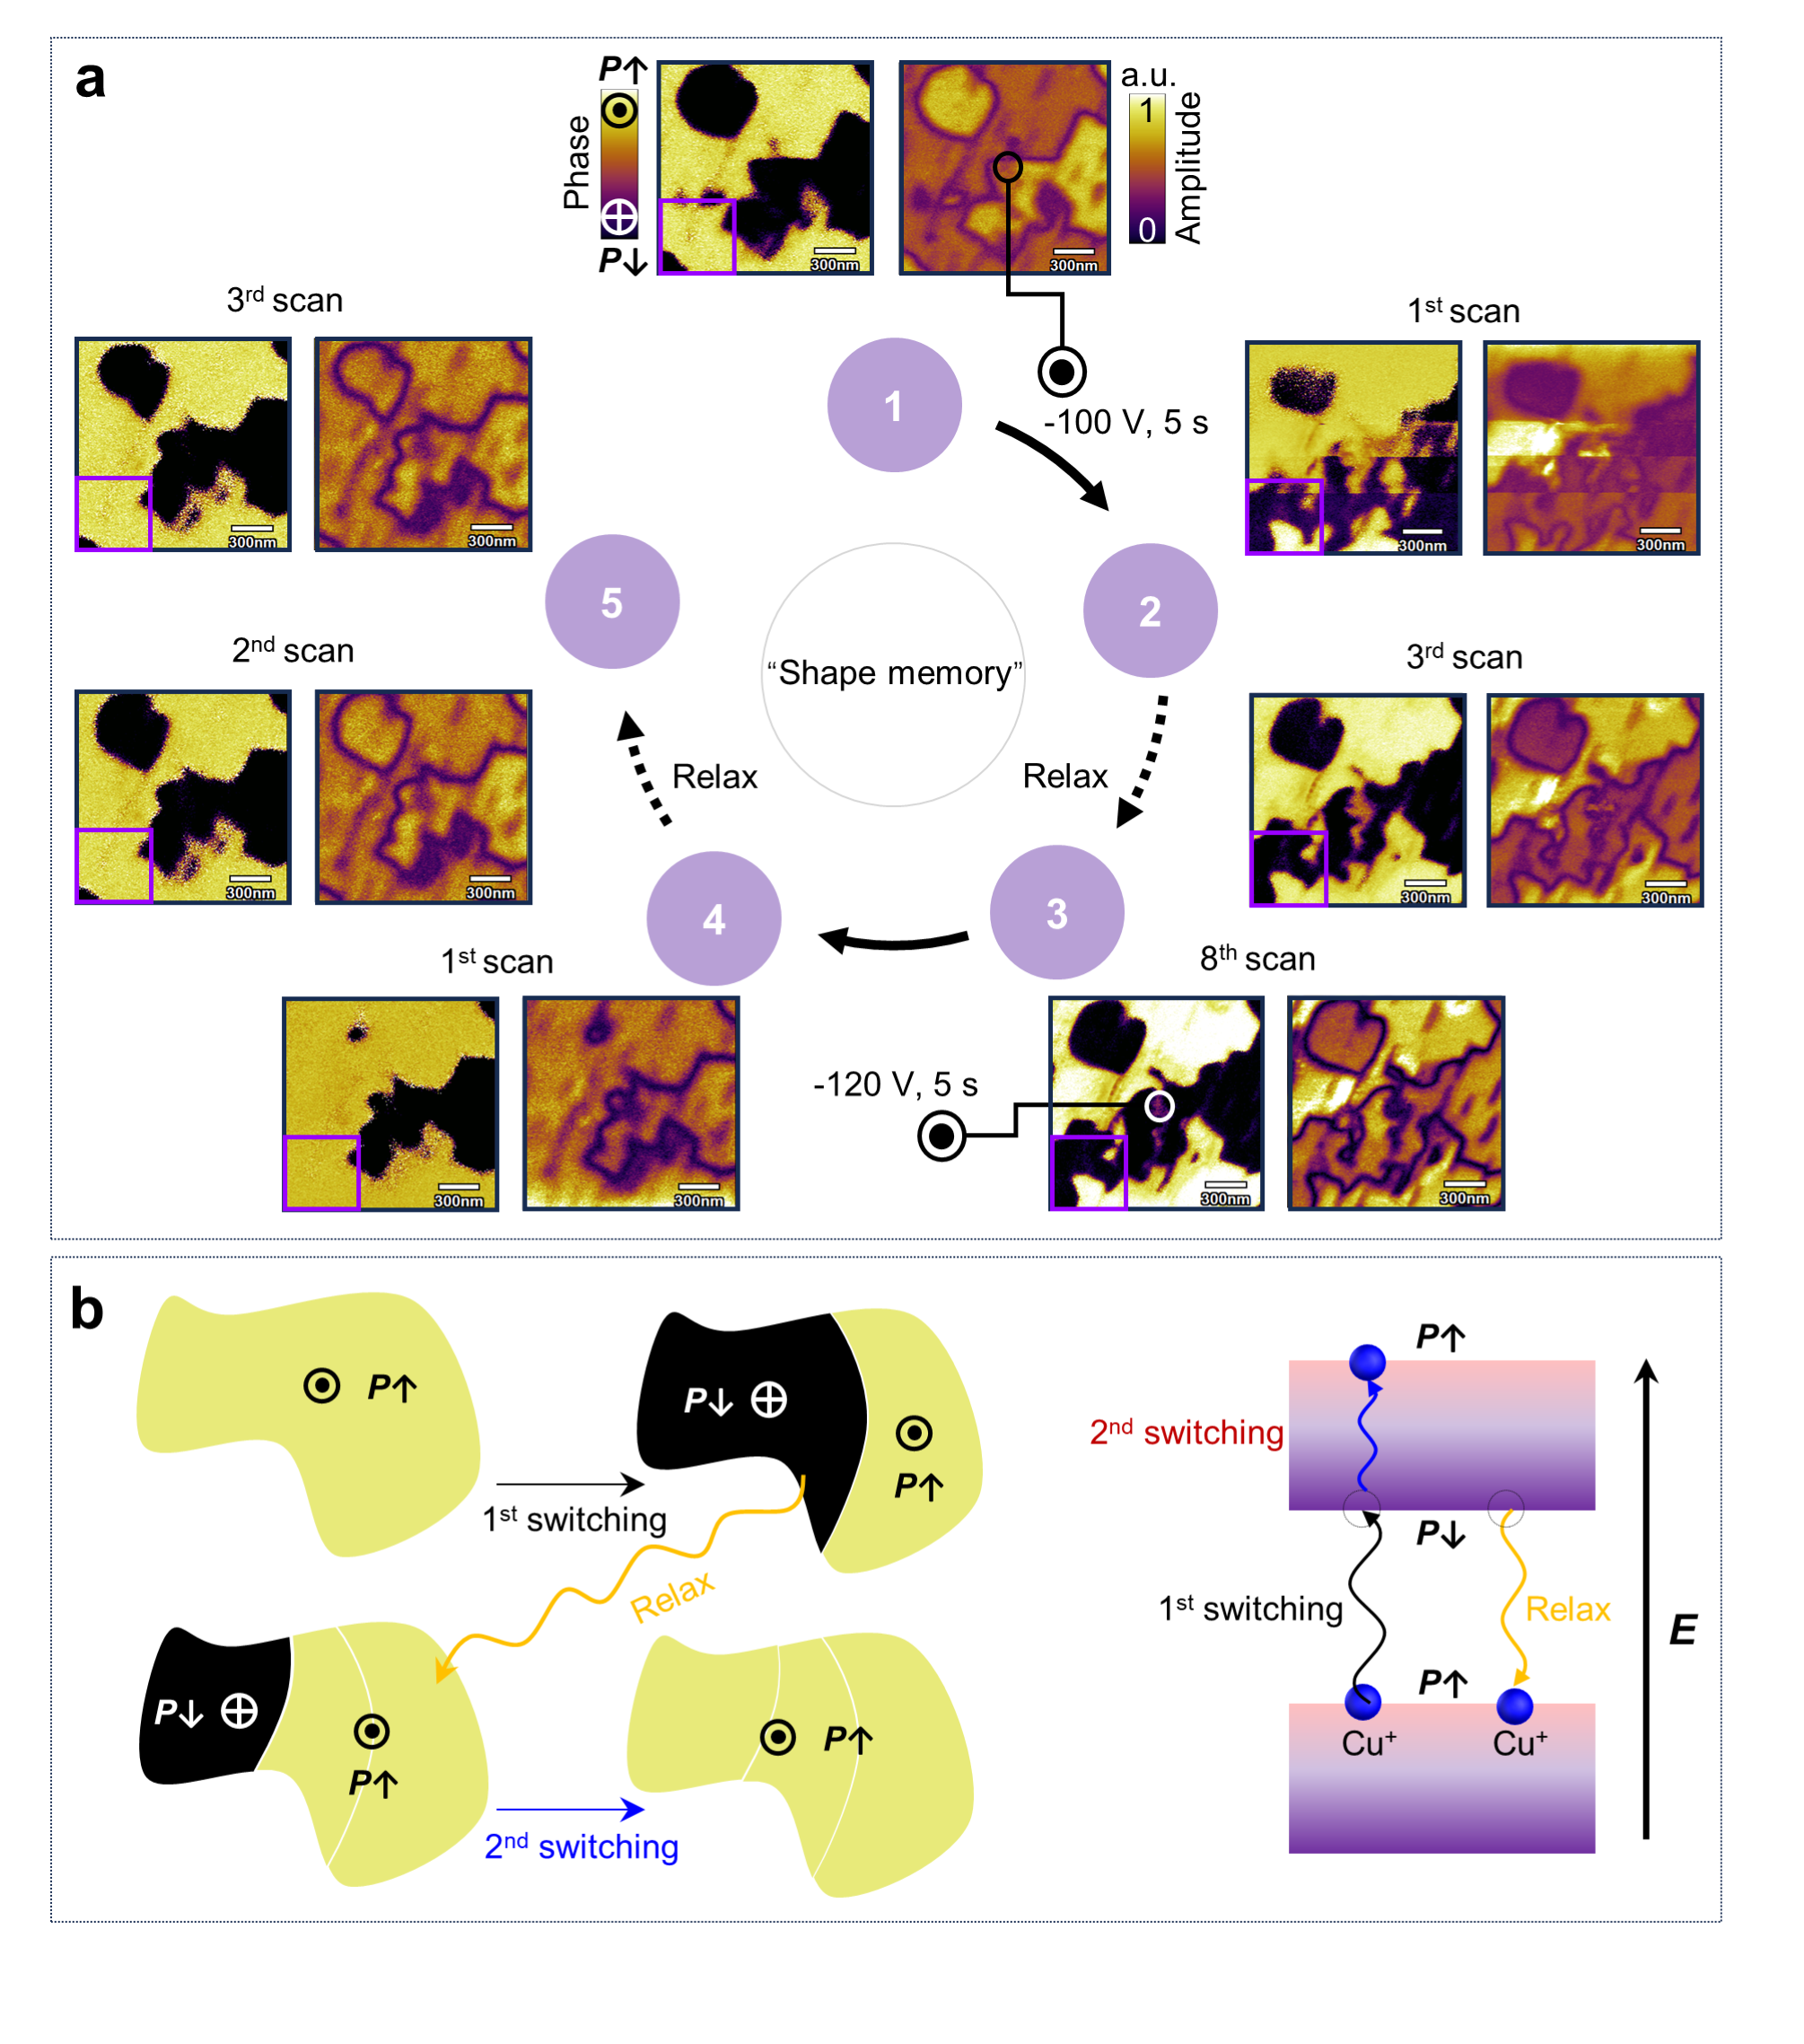


**Extended Data Fig. 4 | The “shape memory” behaviors of ferroelectric domains.** **a** “Shape memory” effect of switched domains during a cyclic switching. In the purple box region, the ferroelectric domains exhibit a “shape memory” effect, disappearing and reappearing with recoverable shape effect during a cyclic switching. **b** The schematic of domain switching behavior and Cu ions migration dynamics within the layers or across the vdW gap during a cyclic switching.
